# Supplementary material for: PTEN mediates the cross talk between breast and glial cells in brain metastases leading to rapid disease progression
Source: PubMed Central journal article supplement (PMC5351620; doi:10.18632/oncotarget.14047), 2016-12-20
Supplement: oncotarget-08-6155-s001.pdf [file oncotarget-08-6155-s001.pdf]

# PTEN mediates the cross talk between breast and glial cells in brain metastases leading to rapid disease progression

## Supplementary Materials

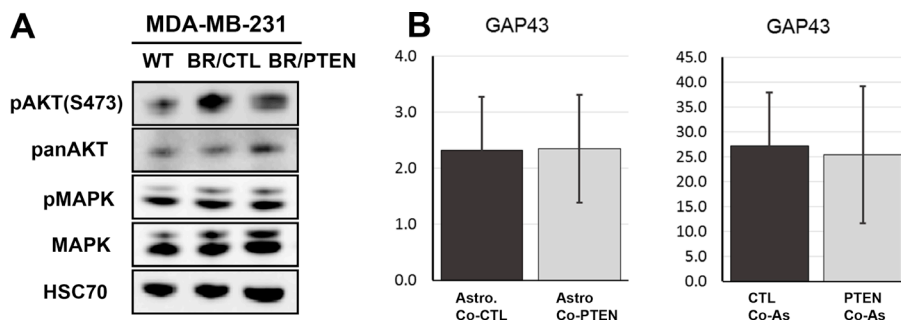

**Supplementary Figure S1:** (A) Immunoblot analysis of MAPK pathway protein expression in MDA-MB-231 (WT) cell line, brain-seeking (BR) sublines with either empty vector control (BR/CTL) or PTEN overexpression (BR/PTEN). HSC70 served as loading control (B) qRT-PCR results for GAP43.

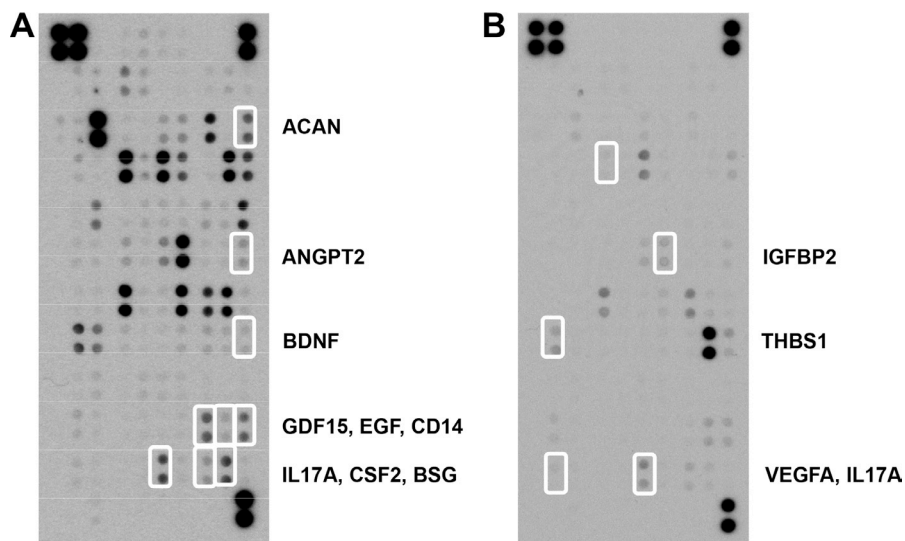

**Supplementary Figure S2:** Cytokine secretion in astrocytes and microglia.

**Supplementary Table S1: qRT-PCR primers used in this study**

| Gene   | mRNA ID        | FW Primer (5' → 3')   | RV Primer (5' → 3')       | T(ann) °C | bp cDNA | Reference          |
|--------|----------------|-----------------------|---------------------------|-----------|---------|--------------------|
| ACAN   | NM_001135.3    | CACACCTGAGCAGCATCGT   | GGTAGTCTTGGGCATTGTTGTT    | 60        | 67      | own primer         |
| ANGPT2 | NM_001147.2    | TGAACCAAACAGCGGAGCAA  | CTCGTGGTCTGATTTAATACTTGGG | 58        | 70      | own primer         |
| BDNF   | NM_170735.5    | GTAACGGCGGCAGACAAAAA  | GTAGTTCGGCACTGGGAGTT      | 58        | 191     | own primer         |
| BSG1-2 | NM_198589.2    | GCGAGGAATAGGAATCATGG  | TCTACGGTAGTGAAGACTGTG     | 60        | 107     | Menck et al., 2015 |
| CD14   | NM_000591.3    | ATAACCTGACACTGGACGGG  | GGAGTTCATTGAGCCCTCGT      | 60        | 74      | own primer         |
| CSF2   | NM_000758.3    | ACACTGCTGCTGAGATGAATG | CTGGAGGTCAAACATTTCTGAGATG | 58        | 59      | own primer         |
| CSF2RA | NM_172249      | ACCCTGTACGTGCTTCCTTCG | CCACTGTTCCGAGATCCGATT     | 58        | 146     | own primer         |
| EGF    | NM_001963.4    | TGGGTATGACCTACAACCTG  | GCATGTGTCGAATATCTTGAG     | 58        | 94      | Menck et al., 2015 |
| GAP43  | NM_001130064.1 | GAGCAGCCAAGCTGAAGAGA  | CTTGTCAGCCTCAGGTTCC       | 60        | 104     | own primer         |
| GDF15  | NM_004864.2    | ATACTACGCCAGAAGTGC    | CCCGAGAGATACGCAGGTG       | 60        | 61      | own primer         |
| IGFBP2 | NM_000597.2    | GCCCTCTGGAGCACCTCTACT | CATCTTGCAGTGTGAGGTTGTAC   | 60        | 80      | own primer         |
| THBS1  | NM_003246.2    | GATGCCTGCTTCAACCACAA  | GGCTTGACACCTGTTTGTT       | 58        | 149     | own primer         |
| VEGFA  | NM_001287044.1 | CTGAGGAGTCCAACATCAC   | GTCTTGCTCTATCTTCTTGG      | 58        | 125     | Menck et al., 2015 |

Menck K et al., Tumor-derived microvesicles mediate human breast cancer invasion through differentially glycosylated EMMPRIN. J Mol Cell Biol. 2015 Apr;7(2)
